RESEARCH ARTICLE

# Fear of falling and depression in older adults: The mediating role of attitudes toward aging and social networks

Dan Zhang , Ziqing Qi , Lulu Wu, Yali Mao, Jia Wang, Yue Zhang, Ruting Wang, Annuo Liu\*

School of Nursing, Anhui Medical University, Hefei, Anhui Province, China

\* [w971002y@sohu.com](mailto:w971002y@sohu.com)

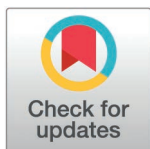

## Abstract

### Objective

Falls represent a common injury among older adults, and fear of falling is a prevalent psychological stressor in this population. This study aims to investigate the relationship between fear of falling and depression in older adults, as well as the chained mediating effects of attitudes toward aging and social networks.

### Methods

Using stratified cluster sampling, 1,158 adults aged 60 and older were surveyed between July and August 2022. Instruments included the Modified Fall Effectiveness Scale (MFES), Geriatric Depression Scale-15 (GDS-15), Attitudes Toward Aging Questionnaire (AAQ), and Local Social Network Scale-6 (LSNS-6). Correlation analysis and mediation effect testing were conducted using SPSS 26.0 and Stata 18.0.

### Results

Fear of falling was positively correlated with depression ( $\beta = 0.36$ ,  $p < 0.001$ ). Attitudes toward aging (Effect = 0.13, 95% CI (0.09, 0.17)) and social networks (Effect = 0.09, 95% CI (0.05, 0.13)) served not only as independent mediators between fear of falling and depression but also as chain mediators (Effect = 0.02, 95% CI (0.01, 0.03)).

### Conclusion

Fear of falling is associated with depression in older adults through aging attitudes and social networks. Healthcare providers should prioritize addressing older adults' fear of falling and develop strategies based on this pathway to reduce the risk of depression in older adults.

## OPEN ACCESS

**Citation:** Zhang D, Qi Z, Wu L, Mao Y, Wang J, Zhang Y, et al. (2025) Fear of falling and depression in older adults: The mediating role of attitudes toward aging and social networks. PLoS One 20(11): e0324415. <https://doi.org/10.1371/journal.pone.0324415>

**Editor:** Ryota Sakurai, Tokyo Metropolitan Institute of Geriatrics and Gerontology, JAPAN

**Received:** April 25, 2025

**Accepted:** October 23, 2025

**Published:** November 13, 2025

**Copyright:** © 2025 Zhang et al. This is an open access article distributed under the terms of the [Creative Commons Attribution License](https://creativecommons.org/licenses/by/4.0/), which permits unrestricted use, distribution, and reproduction in any medium, provided the original author and source are credited.

**Data availability statement:** The relevant data for this study have been openly stored on the Figshare platform (DOI: <https://doi.org/10.6084/m9.figshare.29994334>).

**Funding:** 1. 2023 Major Project of Anhui University Natural Science Foundation: Research on Accurate Prediction and Stage

Matching Intervention of Social Isolation of Elderly Patients with Chronic Diseases Based on Digital Empowerment (2023AH040085). 2. 2024 Anhui Institute of Translational Medicine Joint Open Research Project: Intelligent Classification of Social Isolation in Elderly Chronic Disease Patients and Development of a Follow-up Platform (2024zhyx-h1-B02).

**Competing interests:** The authors have declared that no competing interests exist.

## 1. Introduction

As populations age, the physical and mental health of older adults has received increasing attention. Depression is among the most prevalent mental health conditions in later life, with an estimated global prevalence of 35.1% [1]. It is associated with adverse health outcomes and marked declines in social functioning and quality of life [2,3]. The Notice on Comprehensively Strengthening Elderly Health Services issued by the National Health Commission emphasizes the importance of addressing mental health in older adults, calling for routine mental health assessments and follow-up management for common mental disorders and psychological/behavioral problems such as depression and anxiety. Prioritizing mental health in later life is essential to advancing healthy aging.

Falls are one of the most common injuries faced by older adults and have become the leading cause of injury-related deaths among those aged 65 and older [4]. According to Cognitive Stress Theory [5], an individual's cognitive assessment of stress influences their emotional responses and coping strategies. As individuals age, they perceive a decline in their ability to control their environment and maintain independent living. This diminished confidence in their physical capabilities, coupled with an awareness of the serious consequences of falls, leads to a fear of falling. This fear becomes a major source of stress in later life. Research indicates that this fear of falling exists among both elderly individuals who have experienced falls and those who have not [6]. A significant association has been found between fear of falling and depression in older adults [7,8].

Attitudes toward aging refer to individuals' beliefs, perceptions, and evaluations of their own aging and later life [9]. As a stressor, fear of falling is significantly related to attitudes toward aging [10]. Hobfoll's Conservation of Resources Theory [11] posits that individuals possess a tendency to conserve, protect, and acquire resources; potential or actual resource loss triggers tension and stress in individuals. As individuals age, older adults simultaneously experience both the acquisition and accumulation of personal resources, as well as resource loss and functional decline. Research indicates that a positive attitude toward aging helps older adults cope with life stressors and maintain physical functioning [12,13], whereas a negative attitude toward aging accelerates cognitive decline and increases the risk of anxiety and depression [14,15].

A social network refers to the collection of social connections and relationships formed between individuals or organizations through social interactions [16]. The Theory of Planned Behavior (TPB) [17] posits that an individual's behavioral intention is jointly determined by their attitude, subjective norm, and perceived behavioral control. Fear of falling reflects older adults' diminished sense of self-control, potentially leading them to avoid social activities and resulting in a shrinking or absence of social networks. Multiple studies indicate that a lack of social networks can lead to depression, while supportive social networks help buffer individuals from the harmful effects of negative events and stressors [18,19]. Furthermore, attitudes toward aging are closely related to social networks. Research has found [20] that individuals' attitudes toward aging influence their social networks and social support, which in turn impacts their quality of life.

Cognitive Behavioural Theory (CBT) posits that individuals' thought patterns and cognitive schemas shape their emotions and behaviors, emphasizing the reciprocal interplay among cognition, emotion, and behavior [21]. With advancing age and declining physical function, older adults may construe falling as an unavoidable negative event in the aging process, thereby developing fear of falling as a maladaptive cognitive schema. As a dysfunctional cognitive pattern, fear of falling may foster negative attitudes toward aging and precipitate maladaptive behavioral responses. Older adults may adopt "activity avoidance" as a coping strategy to reduce their perceived risk of falling. However, activity avoidance can further lead to physical decline, diminished social roles, and shrinking social support networks, thereby exacerbating depressive symptoms and creating a vicious cycle. Furthermore, Social Emotional Selection Theory [22] posits that older adults increasingly value emotionally meaningful social relationships with advancing age. Thus, a positive attitude toward aging may strengthen motivation to maintain social networks, while a negative attitude may lead to social withdrawal. This provides theoretical support for the mediating role of aging attitudes in social network maintenance.

Based on the above findings, fear of falling, attitudes toward aging, and social networks are each associated with depression in older adults and may be interrelated. However, research on their joint effects remains limited, and most studies emphasize single determinants rather than providing a comprehensive, multilevel account of pathways to late-life depression. Accordingly, this study examines the association between fear of falling (independent variable) and depression, specifying attitudes toward aging and social networks as mediators. We further investigate the mechanisms through which fear of falling may influence depression in older adults, with the aim of providing a theoretical basis for intervention development in geriatric depression. The research hypotheses are listed below, and the conceptual model is shown in Fig 1.

H1: Fear of falling is positively correlated with depression.

H2: Attitudes toward aging mediate the relationship between fear of falling and depression.

H3: Social networks mediate the relationship between fear of falling and depression.

H4: Attitudes toward aging and social networks exert a chain mediating effect between fear of falling and depression.

## 2. Subjects and methods

### 2.1. Study population

We used a stratified cluster sampling design in Yaohai District, Hefei, China, from July to August 2022. Strata were defined by urban and rural areas. From each stratum, two communities were selected by simple random sampling; within each community, two residential neighborhoods or village groups were randomly chosen as survey sites. Individuals aged

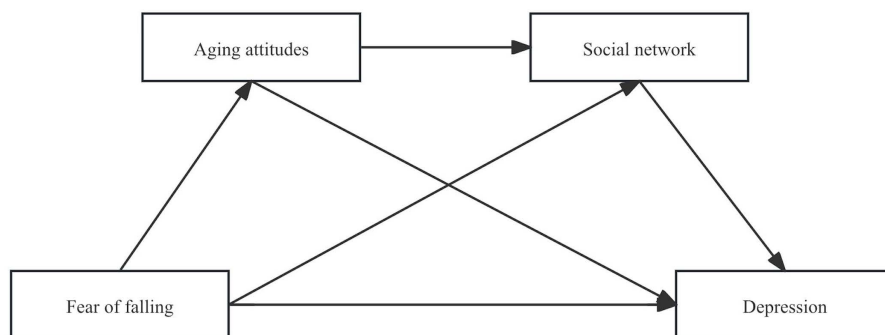

**Fig 1. Chain mediation hypothesis model.** Note: The predictor variable is fear of falling (measured by the Modified Fall Efficacy Scale with reverse scoring; higher scores indicate greater fear of falling).

<https://doi.org/10.1371/journal.pone.0324415.g001>

60 years and older were invited to participate. Inclusion criteria: (1) Age  $\geq 60$  years; (2) Clear consciousness and ability to complete the questionnaire; (3) Voluntary participation in the study and signed informed consent. Exclusion criteria: (1) History of psychiatric disorders or cognitive impairment; (2) History of severe cardiovascular or cerebrovascular disease; (3) Severe impairment in speech, vision, or hearing. This study was approved by the Ethics Committee of Anhui Medical University (Approval No.: 81220209).

## 2.2. Research instruments

**2.2.1. General information questionnaire.** A self-designed general information questionnaire was used to collect participants' demographic characteristics. Variables included sex, age, current marital status, type of residence, educational attainment and living status.

**2.2.2. Modified Fall Efficacy Scale (MFES).** The MFES was developed by Hill et al. [23] as a further revision of the Fall Efficacy Scale (FES). It was adapted into Chinese by domestic scholars including Hao Yanping et al. [24] to assess older adults' confidence in avoiding falls during specific activities. This measure evaluates participants' fall efficacy, thereby reflecting the presence and severity of fall fear. The scale includes 14 items, with 9 covering indoor activities and 5 covering outdoor activities. Each item is rated on an 11-point scale from 0 (no confidence) to 10 (complete confidence). The final score is the mean of all items; lower scores reflect lower fall-related self-efficacy, corresponding to greater fear of falling. To align with the hypothesized direction, we reverse scored the MFES to create a "fear of falling" variable, such that higher values indicate greater fear. In this study, Cronbach's  $\alpha$  was 0.962.

**2.2.3. Geriatric Depression Scale (GDS-15).** The Geriatric Depression Scale translated and revised by Mei Jinrong et al. [25] was adopted. This 15-item scale ranges from 0 to 15 points, with higher scores indicating more severe depressive symptoms. A score  $\geq 8$  indicates depressive symptoms in the subject. In this study, the Cronbach's  $\alpha$  coefficient for this scale was 0.754.

**2.2.4. Attitudes to ageing Questionnaire (AAQ).** The Attitudes to ageing Questionnaire revised by Huang Yifan and colleagues [26] was used. The instrument contains 24 items across three domains: Psychological Growth, Physical Change, and Psychosocial Loss. Items are rated on a 5-point Likert scale, yielding a total score from 24 to 120. Items in the Psychosocial Loss domain are reverse scored. Higher scores indicate more positive attitudes toward aging. In this study, Cronbach's  $\alpha$  was 0.843.

**2.2.5. Lubben Social Network Scale-6 (LSNS-6).** The Lubben Social Network Scale-6, developed by Lubben et al. [27], was used. The instrument comprises two domains, family network and friends network, with six items in total. Items are rated on a 6-point Likert scale, producing a total score from 0 to 30. Each subscale ranges from 0 to 15. Higher scores indicate stronger family or friends networks among older adults. In this study, Cronbach's  $\alpha$  was 0.776.

## 2.3. Data collection methods

Questionnaires were collected from July to August 2022 through door-to-door visits and on-site surveys at community activity centers. All interviewers received standardized training. After providing written informed consent, the purpose of the survey was explained to participants. After obtaining informed consent, participants were guided to complete the questionnaire, which was collected on-site. Any omitted items were confirmed and supplemented if necessary. A total of 1,158 questionnaires were distributed. After excluding 39 questionnaires with missing data relevant to this study, 1,117 valid questionnaires were obtained, yielding an effective response rate of 96.46%.

## 2.4. Statistical methods

Data were analyzed using SPSS 26.0 and Stata 18.0. Common method bias tests were conducted in SPSS 26.0 to examine relationships among variables, while chained mediation effects were tested in Stata 18.0.

### 3. Results

#### 3.1. Common method bias test

The Harman single-factor test was employed to examine common method bias. An exploratory factor analysis was conducted simultaneously on all items across four variables: fall efficacy, attitudes toward aging, social networks, and depression. Results revealed 14 factors with eigenvalues exceeding 1, with the largest factor explaining 18.84% of variance (<40%). Thus, no severe common method bias was identified in this study.

#### 3.2. Demographic characteristics of participants

A total of 1,117 participants were included in the analysis: 440 men (39.4%) and 677 women (60.6%). By age group, 576 (51.6%) were 60–69 years, 420 (37.6%) were 70–79 years, and 121 (10.8%) were ≥80 years. The prevalence of depression differed significantly by age group, educational attainment, and residence type ( $p < 0.05$ ). Additional characteristics are presented in [Table 1](#).

#### 3.3. Descriptive statistics and correlation analysis

Correlation analysis of all variables yielded the results shown in [Table 2](#). Significant correlations were found among fear of falling, attitudes toward aging, social networks, and depression. The mean scores for fear of falling, attitudes toward aging, social networks, and depression were 0.69, 75.05, 12.28, and 3.82, respectively. Fear of falling was negatively correlated with attitudes toward aging and social networks ( $r = -0.31, p < 0.001$ ;  $r = -0.25, p < 0.001$ ), and positively correlated with depression ( $r = 0.35, p < 0.001$ ). Attitudes toward aging were positively correlated with social networks ( $r = 0.20, p < 0.001$ ) and negatively correlated with depression ( $r = -0.32, p < 0.001$ ). Social networks were negatively correlated with depression ( $r = -0.31, p < 0.001$ ).

#### 3.4. Chain mediation effect test

Using fear of falling as the independent variable and depression as the dependent variable, we established a chained mediation model with aging attitudes and social networks as mediating variables, while incorporating significant variables from univariate analysis (age, educational attainment, and living status) as covariates. Given the hierarchical cluster sampling design, we accounted for cluster effects by treating “community” as the clustering level for cluster-robust inference. Cluster-robust standard errors (CRSE) and their corresponding 95% confidence intervals were reported for all key models.

Test results are presented in [Table 3](#). Fear of falling was positively correlated with depression ( $\beta = 0.36, p < 0.001$ ) and negatively correlated with aging attitudes ( $\beta = -0.31, p < 0.001$ ) and social networks ( $\beta = -0.20, p = 0.004$ ). When fear of falling, aging attitudes, and social networks were simultaneously included in the regression equation, all three variables showed significant associations with depression. Fear of falling positively correlated with depression ( $\beta = 0.25, p < 0.001$ ), while attitudes toward aging ( $\beta = -0.20, p = 0.003$ ) and social networks ( $\beta = -0.21, p = 0.001$ ) negatively correlated with depression. Attitudes toward aging positively correlated with social networks ( $\beta = 0.13, p = 0.004$ ).

Further testing of mediating pathways revealed (see [Table 4](#)) that attitudes toward aging and social networks partially mediated the relationship between fear of falling and depression (Effect = 0.24, 95% CI (0.18, 0.29)), accounting for 31.58% of the total effect. The mediating effect of aging attitudes between fear of falling and depression was (Effect = 0.13, 95% CI (0.09, 0.17)), accounting for 17.11% of the total effect. The mediating effect of social networks between fear of falling and depression was (Effect = 0.09, 95% CI (0.05, 0.13)), accounting for 11.84% of the total effect. The chained mediating effect of aging attitudes and social networks between fear of falling and depression was (Effect = 0.02, 95% CI (0.01, 0.03)), accounting for 2.63% of the total effect. The chained mediation model diagram and path coefficients for each variable are shown in [Fig 2](#).

**Table 1. Generalization of depression conditions in the elderly (n = 1117).**

| Variables                               | n(%)       | Depression score ( $\bar{x} \pm s$ ) | t/F Value | p Value |
|-----------------------------------------|------------|--------------------------------------|-----------|---------|
| Sex                                     |            |                                      | -1.766    | 0.078   |
| Male                                    | 440 (39.4) | 3.62 $\pm$ 3.00                      |           |         |
| Female                                  | 667 (60.6) | 3.94 $\pm$ 2.90                      |           |         |
| Age, years                              |            |                                      | 6.320     | 0.002   |
| 60 ~ 69                                 | 575 (51.6) | 3.76 $\pm$ 2.97                      |           |         |
| 70 ~ 79                                 | 420 (37.6) | 3.64 $\pm$ 2.91                      |           |         |
| $\geq 80$                               | 121 (10.8) | 4.69 $\pm$ 2.82                      |           |         |
| Type of residence                       |            |                                      | -1.28     | 0.203   |
| Urban                                   | 950 (85.0) | 3.77 $\pm$ 3.01                      |           |         |
| Rural                                   | 167 (15.0) | 4.05 $\pm$ 2.54                      |           |         |
| Current marital status                  |            |                                      | 1.287     | 0.198   |
| Without spouse                          | 172 (15.4) | 4.08 $\pm$ 2.87                      |           |         |
| With spouse                             | 945 (84.6) | 3.77 $\pm$ 2.96                      |           |         |
| Educational attainment                  |            |                                      | 5.236     | 0.001   |
| Primary school or below                 | 857 (76.7) | 4.00 $\pm$ 2.97                      |           |         |
| Junior high school                      | 147 (13.2) | 3.03 $\pm$ 2.56                      |           |         |
| Senior high school/secondary vocational | 92 (8.2)   | 3.40 $\pm$ 3.02                      |           |         |
| College/associate degree                | 21 (1.9)   | 3.81 $\pm$ 3.30                      |           |         |
| Living status                           |            |                                      | 7.268     | <0.001  |
| Living alone                            | 123 (11.0) | 4.52 $\pm$ 3.07                      |           |         |
| Living with spouse                      | 471 (42.2) | 3.66 $\pm$ 2.88                      |           |         |
| Living with children                    | 228 (20.4) | 4.44 $\pm$ 3.04                      |           |         |
| Living with spouse, children            | 287 (25.7) | 3.29 $\pm$ 2.82                      |           |         |
| Living with others                      | 8 (0.7)    | 3.00 $\pm$ 1.60                      |           |         |

**Notes:**

a. Depression scores are presented as mean  $\pm$  SD; categorical variables as n (%).

b. Group comparisons: independent-samples t tests were used for binary variables (sex, type of residence, current marital status), and one-way ANOVA was used for variables with  $\geq 3$  categories (age, educational attainment, living status). The corresponding t or F statistics are reported; p values are two-sided with  $\alpha = 0.05$ .

c. Variable coding (for subsequent analyses): sex (1 = male, 2 = female); type of residence (1 = urban, 2 = rural); current marital status (0 = with spouse, 1 = without spouse); age (1 = 60–69 years, 2 = 70–79 years, 3 =  $\geq 80$  years); educational attainment (1 = primary school or below, 2 = junior high school, 3 = senior high school/secondary vocational, 4 = college/associate degree); living status (1 = living alone, 2 = living with spouse, 3 = living with children, 4 = living with spouse and children, 5 = living with others).

<https://doi.org/10.1371/journal.pone.0324415.t001>

**Table 2. Descriptive statistics and correlation analysis of variables.**

| Variables          | M $\pm$ SD       | 1        | 2        | 3        |
|--------------------|------------------|----------|----------|----------|
| 1. Fear of falling | 0.69 $\pm$ 1.39  |          |          |          |
| 2. Aging attitudes | 75.05 $\pm$ 9.54 | -0.31*** |          |          |
| 3. Social network  | 12.28 $\pm$ 4.97 | -0.25*** | 0.20***  |          |
| 4. Depression      | 3.82 $\pm$ 2.95  | 0.35***  | -0.32*** | -0.31*** |

Note: \*\*\*p < 0.001.

<https://doi.org/10.1371/journal.pone.0324415.t002>



**Table 3. Regression analysis of variable relationships in chained mediation.**

| Outcome Variables | Predictive variables | R    | R <sup>2</sup> | F     | $\beta$ | t      | p      | Cluster-robust SE | 95%CI |       |
|-------------------|----------------------|------|----------------|-------|---------|--------|--------|-------------------|-------|-------|
|                   |                      |      |                |       |         |        |        |                   | Lower | Upper |
| Depression        | Fear of falling      | 0.37 | 0.14           | 43.95 | 0.36    | 15.58  | <0.001 | 0.07              | 0.30  | 0.41  |
| Aging attitudes   | Fear of falling      | 0.32 | 0.10           | 31.17 | -0.31   | -10.28 | <0.001 | 0.21              | -0.38 | -0.24 |
| Social network    |                      | 0.30 | 0.09           | 21.68 |         |        |        |                   |       |       |
|                   | Fear of falling      |      |                |       | -0.20   | -4.18  | 0.004  | 0.15              | -0.32 | -0.09 |
|                   | Aging attitudes      |      |                |       | 0.13    | 4.12   | 0.004  | 0.03              | 0.06  | 0.21  |
| Depression        |                      | 0.47 | 0.22           | 52.62 |         |        |        |                   |       |       |
|                   | Fear of falling      |      |                |       | 0.25    | 15.95  | <0.001 | 0.08              | 0.21  | 0.28  |
|                   | Aging attitudes      |      |                |       | -0.20   | -4.54  | 0.003  | 0.04              | -0.30 | -0.10 |
|                   | Social network       |      |                |       | -0.21   | -6.03  | 0.001  | 0.03              | -0.29 | -0.13 |

<https://doi.org/10.1371/journal.pone.0324415.t003>

**Table 4. Mediating effect values and proportion of effect.**

| Type of effect         | Pathway relationship                                      | Effect value | cluster-robust SE | Relative mediation effect | $\beta$ | t     | p      | Boot CI lower | Boot CI upper |
|------------------------|-----------------------------------------------------------|--------------|-------------------|---------------------------|---------|-------|--------|---------------|---------------|
| Direct effect          | Fear of falling→Depression                                | 0.52         | 0.06              | 68.42%                    | 0.53    | 8.48  | <0.001 | 0.39          | 0.62          |
| Mediation effect       | Fear of falling→Aging attitudes→Depression                | 0.13         | 0.05              | 17.11%                    | 0.12    | 2.90  | 0.004  | 0.09          | 0.17          |
|                        | Fear of falling→Social network→Depression                 | 0.09         | 0.03              | 11.84%                    | 0.10    | 2.94  | 0.003  | 0.05          | 0.13          |
|                        | Fear of falling→Aging attitudes→Social network→Depression | 0.02         | 0.02              | 2.63%                     | 0.01    | 2.28  | 0.022  | 0.01          | 0.03          |
| Total mediation effect |                                                           | 0.24         | 0.04              | 31.58%                    | 0.25    | 3.07  | 0.002  | 0.18          | 0.29          |
| Total effect           |                                                           | 0.76         | 0.05              | 100%                      | 0.75    | 12.52 | <0.001 | 0.63          | 0.87          |

<https://doi.org/10.1371/journal.pone.0324415.t004>

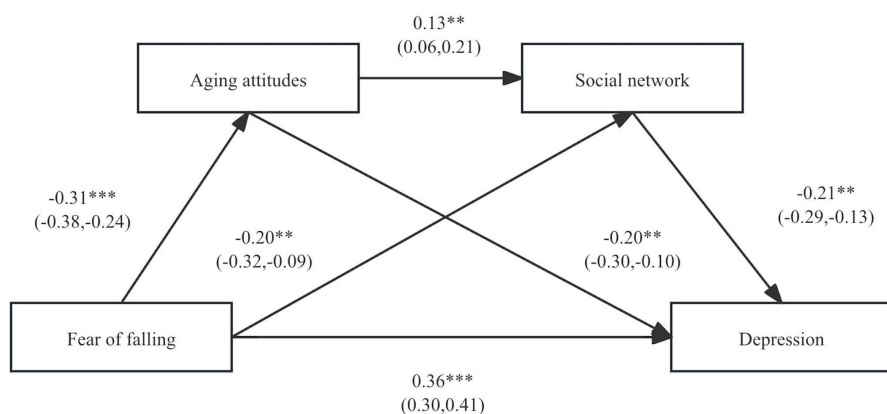

**Fig 2. Chain mediation model of fear of falling predicting depression.** Note: \*\* $p < 0.01$ ; \*\*\* $p < 0.001$ .

<https://doi.org/10.1371/journal.pone.0324415.g002>

## 4. Discussion

### 4.1. Fear of falling is positively correlated with depression

Our findings show that fear of falling is positively associated with depressive symptoms ( $\beta = 0.36$ ,  $p < 0.001$ ). In other words, older adults reporting greater fear of falling were more likely to endorse depressive symptoms. Prior research suggests that advancing age, declines in physical function, and changes in social roles can weaken psychological defenses and emotion regulation, increasing vulnerability to mood problems, particularly depression [28]. When fear of falling develops, many older adults have difficulty using timely cognitive reappraisal to relieve negative affect. Persistent fear maintains heightened worry and tension, adds psychological burden, and can precipitate depressive symptoms. Therefore, fear of falling, as a specific negative psychological state in later life, has important implications for mental health. Healthcare providers should regularly assess the psychological well-being of older adults and use evidence-based interventions such as cognitive behavioral therapy to alleviate fear of falling and reduce the risk of depression.

### 4.2. Mediating role of attitudes toward aging

This study found a significant association between fear of falling and attitudes toward aging. Cross-cultural research indicates that sociocultural context strongly shapes these attitudes [29]. Western societies tend to emphasize personal independence and self-actualization, highlighting individual agency and perceived control in the aging process [30]. In contrast, in China, Confucian filial piety and collectivist values link attitudes toward aging more closely to family responsibilities and intergenerational support; these attitudes include both positive appraisals of longevity and experience and concerns about dependence and burden [31]. For many Chinese older adults, fear of falling may be construed as a visible marker of physical decline and instability, reinforcing negative self-perceptions of aging and deepening unfavorable attitudes toward the aging process. Empirical evidence shows that negative aging attitudes heighten stress responses to age-related stressors and increase depression risk [32], whereas positive attitudes facilitate coping, enhance life satisfaction, and reduce the likelihood of depression [33]. Consistent with this literature, our results indicate that attitudes toward aging mediate the relationship between fear of falling and depressive symptoms. The indirect effect accounted for 17.11% of the total effect and was larger than the other pathways examined. Encouraging and supporting more positive attitudes toward aging can strengthen self-confidence and self-efficacy in later life and may help lower the incidence of depression.

### 4.3. Mediating role of social networks

Mediation analysis showed that social networks mediate the association between fear of falling and depressive symptoms. With advancing age, fear of falling tends to increase. Heightened fear can lead to activity restriction and reluctance to participate in social activities, which over time reduces the size and quality of older adults' networks. Evidence indicates that limited networks promote social isolation, contributing to frailty and depression [34]. In contrast, family and friend networks provide emotional and instrumental support that buffers the impact of negative life events [35], strengthens confidence in managing fall-related risks, and lowers vulnerability to depression. These findings highlight the need for society and families to promote social engagement among older adults by expanding opportunities for participation and encouraging sustained involvement in community and family activities.

### 4.4. Chain mediation of aging attitudes and social networks

The findings confirm the chain mediation effect of aging attitudes and social networks between fear of falling and depression. This aligns with Menkin et al.'s [36] results, indicating that positive attitudes toward aging enable older adults to form more new friendships and develop richer social networks in later life. As a stressor, fear of falling can influence older adults' perceptions of aging. Older adults with positive aging beliefs tend to counteract fear of falling by increasing physical



and social activities [11]. Conversely, those holding negative aging beliefs often avoid stress by reducing activities, which diminishes the size of their social networks and subsequently impacts their emotional well-being. Therefore, it is crucial to help older individuals develop accurate perceptions of aging and encourage them to actively cultivate social networks.

#### 4.5. Implications and limitations

This study elucidates the linkage between fear of falling and depression from dual perspectives of aging cognition and social support, thereby broadening the lens on risk factors for late-life mental health. Consistent with prior work, our findings underscore the salience of attitudes toward aging in coping with the aging process [37] and highlight the pivotal role of social networks in safeguarding psychological well-being among older adults. The results both echo international research on positive aging and mental health and foreground culturally specific risks in China, where family dependence and gaps in social support may heighten vulnerability. By incorporating a cross-cultural perspective, the study deepens understanding of aging attitudes and provides a theoretical basis for designing interventions that align with local socio-cultural contexts. In addition, the findings emphasize the importance of cultivating positive attitudes toward aging and fostering supportive social networks to promote mental health and social well-being in later life, thereby offering theoretical support and practical avenues for advancing active aging strategies. The study also refines the application of psychological theories to the fear of falling–depression linkage and suggests new analytic directions for subsequent research.

The findings offer actionable guidance for policymakers, health care professionals, and community practitioners. For policymakers, aging services should integrate mental health and social support, including routine screening and intervention for fear of falling within medical and long-term care systems, environmental modifications that reduce fall risk, and public campaigns that promote positive views of aging and age-friendly communities. For health care professionals, interventions should extend beyond fall-prevention education to include psychological components that challenge negative aging beliefs and strengthen adaptive coping. For communities, expanding activity offerings and opportunities for social participation can enhance social support systems, build positive aging attitudes and resilience, and reduce depression risk. Coordinated, multilevel efforts across sectors are needed to promote integrated improvements in physical, psychological, and social functioning among older adults.

This study has limitations. First, the cross-sectional design precludes inferences about temporal ordering or causality. Accordingly, the term “serial mediation” denotes an association pattern consistent with the data rather than a demonstrated causal pathway. Second, we did not conduct multidimensional analyses of each construct, such as distinguishing family and friend components of social networks, which limits the specificity of guidance for practice. Future studies should incorporate multidimensional **measures** to yield more precise estimates and intervention targets.

#### Author contributions

**Conceptualization:** Dan Zhang, Annuo Liu.

**Data curation:** Dan Zhang, Ziqing Qi, Lulu Wu.

**Formal analysis:** Dan Zhang, Ziqing Qi, Lulu Wu.

**Funding acquisition:** Dan Zhang, Annuo Liu.

**Investigation:** Dan Zhang, Ziqing Qi, Lulu Wu, Yali Mao, Jia Wang, Yue Zhang, Ruting Wang.

**Methodology:** Dan Zhang, Ziqing Qi, Lulu Wu, Yali Mao.

**Project administration:** Dan Zhang.

**Resources:** Dan Zhang, Ziqing Qi, Lulu Wu.

**Software:** Dan Zhang, Ziqing Qi.

**Supervision:** Dan Zhang, Yali Mao, Jia Wang, Yue Zhang.

**Validation:** Jia Wang, Yue Zhang, Ruting Wang.

**Writing – original draft:** Dan Zhang.

**Writing – review & editing:** Dan Zhang, Annuo Liu.

## References

1. Cai H, Jin Y, Liu R, Zhang Q, Su Z, Ungvari GS, et al. Global prevalence of depression in older adults: A systematic review and meta-analysis of epidemiological surveys. *Asian J Psychiatr*. 2023;80:103417. <https://doi.org/10.1016/j.ajp.2022.103417> PMID: 36587492
2. Zhang Y, Chen Y, Ma L. Depression and cardiovascular disease in elderly: Current understanding. *J Clin Neurosci*. 2018;47:1–5. <https://doi.org/10.1016/j.jocn.2017.09.022> PMID: 29066229
3. Sivertsen H, Bjørkløf GH, Engedal K, Selbæk G, Helvik A-S. Depression and Quality of Life in Older Persons: A Review. *Dement Geriatr Cogn Disord*. 2015;40(5–6):311–39. <https://doi.org/10.1159/000437299> PMID: 26360014
4. Center for Prevention and Control of Chronic Non-communicable Diseases, Chinese Center for Disease Control and Prevention (CDC), Statistical Information Center of the National Health Commission. National Disease Surveillance System Cause of Death Surveillance Data Set 2020. Beijing: China Science and Technology Press; 2021.
5. Ursin H, Eriksen HR. Cognitive activation theory of stress (CATS). *Neurosci Biobehav Rev*. 2010;34(6):877–81. <https://doi.org/10.1016/j.neubiorev.2009.03.001> PMID: 20359586
6. Song M, Pi HY, Qiang YY, Liu YH, Ye M. Analysis on the status and influencing factors of falls in the elderly. *J Prevent Med Chinese People Liberat Army*. 2020;38(09):39–41. <https://doi.org/10.13704/j.cnki.jyyx.2020.09.013>
7. Abou L, Peters J, Freire B, Sosnoff JJ. Fear of falling and common symptoms of multiple sclerosis: Physical function, cognition, fatigue, depression, and sleep - A systematic review. *Mult Scler Relat Disord*. 2024;84:105506. <https://doi.org/10.1016/j.msard.2024.105506> PMID: 38422635
8. Yao Q, Jin W, Li Y. Associations between fear of falling and activity restriction and late life depression in the elderly population: Findings from the Irish longitudinal study on ageing (TILDA). *J Psychosom Res*. 2021;146:110506. <https://doi.org/10.1016/j.jpsychores.2021.110506> PMID: 34010733
9. Tang D, Yan L, Wang DH. The relationship between the attitudes toward aging and the mental health among older adults. *Chinese J Clin Psychol*. 2014;22(01):159–62. <https://doi.org/10.16128/j.cnki.1005-3611.2014.01.037>
10. Li C, Zhang DD, Wang XH, Liu L, Han MF, Chen CL, et al. Analysis of factors associated with self-perceived aging in elderly hypertensive patients. *Contemporary Nurse*. 2016;(08):103–5. Chinese.
11. Alvaro C, Lyons RF, Warner G, Hobfoll SE, Martens PJ, Labonté R, et al. Conservation of resources theory and research use in health systems. *Implement Sci*. 2010;5:79. <https://doi.org/10.1186/1748-5908-5-79> PMID: 20961445
12. Wang XG, Cao QQ, Li HM, Li F. Advances in research on attitudes toward aging and health effects in older adults. 2021;41(10):2237–40. Chinese. <https://doi.org/10.3969/j.issn.1005-9202.2021.10.061>
13. Bodner E, Shrira A, Palgi Y. Attitudes to aging mediate the reciprocal effects of health anxiety and physical functioning. *Psychol Health*. 2023;38(2):190–208. <https://doi.org/10.1080/08870446.2021.1956496> PMID: 34293984
14. Chen L, Guo W, Perez C. The Effect of Aging Attitudes on the Quality of Life of Older Adults in China. *Res Aging*. 2021;43(2):96–106. <https://doi.org/10.1177/0164027520948192> PMID: 32783499
15. Siebert JS, Wahl H-W, Schröder J. The Role of Attitude Toward Own Aging for Fluid and Crystallized Functioning: 12-Year Evidence From the ILSE Study. *J Gerontol B Psychol Sci Soc Sci*. 2018;73(5):836–45. <https://doi.org/10.1093/geronb/gbw050> PMID: 27125833
16. Schram MT, Assendelft WJJ, van Tilburg TG, Dukers-Muijers NHTM. Social networks and type 2 diabetes: a narrative review. *Diabetologia*. 2021;64(9):1905–16. <https://doi.org/10.1007/s00125-021-05496-2> PMID: 34189591
17. Bosnjak M, Ajzen I, Schmidt P. The Theory of Planned Behavior: Selected Recent Advances and Applications. *Eur J Psychol*. 2020;16(3):352–6. <https://doi.org/10.5964/ejop.v16i3.3107> PMID: 33680187
18. Feng ZX, Shi JM, Jiang CX, Deji ZM. The impact of Internet use on depression symptoms among older adults: The mediating role of social networks and the moderating role of urban-rural disparity. *Psychol Sci*. 2024;47(01):161–9. Chinese. <https://doi.org/10.16719/j.cnki.1671-6981.20240119>
19. Gable SL, Bedrov A. Social isolation and social support in good times and bad times. *Curr Opin Psychol*. 2022;44:89–93. <https://doi.org/10.1016/j.copsyc.2021.08.027> PMID: 34600413
20. Gai Tobe R, Izumida N. Gender disparity in the individual attitude toward longevity among Japanese population: Findings from a national survey. *PLoS One*. 2021;16(8):e0254779. <https://doi.org/10.1371/journal.pone.0254779> PMID: 34407083
21. Wilde JL, Dozois DJA. A dyadic partner-schema model of relationship distress and depression: Conceptual integration of interpersonal theory and cognitive-behavioral models. *Clin Psychol Rev*. 2019;70:13–25. <https://doi.org/10.1016/j.cpr.2019.03.003> PMID: 30875565
22. Bae M, Jeon S, Walker K. Future Time Perspective, Priority of Social Goals, and Friend Networks in Old Age: Evidence for Socioemotional Selectivity Theory Using Subjective Age Gap. *Healthcare (Basel)*. 2022;11(1):22. <https://doi.org/10.3390/healthcare11010022> PMID: 36611482

23. Hill KD, Schwarz JA, Kalogeropoulos AJ, Gibson SJ. Fear of falling revisited. *Arch Phys Med Rehabil*. 1996;77(10):1025–9. [https://doi.org/10.1016/s0003-9993\(96\)90063-5](https://doi.org/10.1016/s0003-9993(96)90063-5) PMID: [8857881](#)
24. Hao YP, Liu XQ. Research of application of the Modified Fall Efficacy Scale of Chinese version in the aged in China. *Chinese J Nurs*. 2007;(01):19–21. Chinese.
25. Mei JR. Reliability and Validity of GDS and GHQ short form for the aged. *Chinese J Psychiatry*. 1999;01:40–2. Chinese. <https://doi.org/10.3760/j.issn:1006-7884.1999.01.013>
26. Huang YF, Wang DH, Liu YG, Laidlaw K. Application of Attitudes to Aging Questionnaire (AAQ) among Chinese aged adults. *Chinese J Clin Psychol*. 2010;18(04):447–50. Chinese. <https://doi.org/10.16128/j.cnki.1005-3611.2010.04.021>
27. Lubben J, Blozik E, Gillmann G, Iliffe S, von Renteln Kruse W, Beck JC, et al. Performance of an abbreviated version of the Lubben Social Network Scale among three European community-dwelling older adult populations. *Gerontologist*. 2006;46(4):503–13. <https://doi.org/10.1093/geront/46.4.503> PMID: [16921004](#)
28. Cheng MY, Zhang RX, Gu CF, et al. Research advances in emotional regulation strategies for elderly patients with depression. *Chinese J Gerontol*. 2020;40(23):5133–6. Chinese.
29. North MS, Fiske ST. Modern Attitudes Toward Older Adults in the Aging World: A Cross-Cultural Meta-Analysis. *Psychol Bull*. 2015;141(5):993–1021. <https://doi.org/10.1037/a0039469> PMID: [26191955](#)
30. Chu L, Lay JC, Tsang VHL, Fung HH. Attitudes Toward Aging: A Glance Back at Research Developments Over the Past 75 Years. *J Gerontol B Psychol Sci Soc Sci*. 2020;75(6):1125–9. <https://doi.org/10.1093/geronb/gbz155> PMID: [32484890](#)
31. Sun Q, Zhu WJ. Research progress on older adults' attitudes towards ageing. *General Practice Nursing*. 2023;21(35):4950–3. Chinese.
32. Bellintier JA, Neupert SD. Negative Aging Attitudes Predict Greater Reactivity to Daily Stressors in Older Adults. *J Gerontol B Psychol Sci Soc Sci*. 2018;73(7):1155–9. <https://doi.org/10.1093/geronb/gbw086> PMID: [27489092](#)
33. Park J, Hess TM. The effects of personality and aging attitudes on well-being in different life domains. *Aging Ment Health*. 2020;24(12):2063–72. <https://doi.org/10.1080/13607863.2019.1660849> PMID: [31480904](#)
34. Tang D, Zhang K. The role of social networks in the association between physical health and mental health among older adults. *Social Construct*. 2023;10(04):60–71. Chinese.
35. You M, Liu AN, Ding Y, Huang DD, Zhang LL, Jiang YQ. Effect of intergenerational support, social networks on depression in older adults: the mediating role of aging attitude. *Modern Prevent Med*. 2023;50(10):1859–63. Chinese. <https://doi.org/10.20043/j.cnki.MPM.202212180>
36. Menkin JA, Robles TF, Gruenewald TL, Tanner EK, Seeman TE. Positive Expectations Regarding Aging Linked to More New Friends in Later Life. *J Gerontol B Psychol Sci Soc Sci*. 2017;72(5):771–81. <https://doi.org/10.1093/geronb/gbv118> PMID: [26903172](#)
37. Yin LX, Wang HR, Gao JL. Effect of cognitive function on mental health status among rural elderly: Mediating effects of attitudes toward aging. *China J Health Psychol*. 2023;31(12):1773–9. Chinese. <https://doi.org/10.13342/j.cnki.cjhp.2023.12.003>
